# Supplementary material for: Immunogenicity of a third dose viral-vectored COVID-19 vaccine after receiving two-dose inactivated vaccines in healthy adults
Source: bioRxiv or medRxiv preprint supplement (doi:10.1101/2021.09.16.21263692), 2021-09-21
Supplement: Supplementary file [file media-1.pdf]

**Supplementary Table 1.** Total anti-RBD immunoglobulins, Anti-RBD IgG, Anti-S1 IgA, Surrogate virus neutralization test against Wild-type, B.1.1.7, B.1.351 and B.1.617.2 in the vaccinees in this study.

| Results                                                   | CoronaVac/CoronaVac<br>(n = 170)        | AZD1222/AZD1222<br>(n = 169)             | CoronaVac<br>(full vac.)<br>+ AZD1222<br>(n = 210) |
|-----------------------------------------------------------|-----------------------------------------|------------------------------------------|----------------------------------------------------|
| Immunoglobulin anti-RBD (U/mL) GMT (95% CI)               | 97.94<br>(82.59, 116.1)                 | 877.1<br>(763.5, 1008)                   | 7947<br>(7277, 8679)                               |
| IgG anti-RBD (BAU/mL) GMT (95% CI)                        | 128.0<br>(113.7, 144.1)                 | 178.0<br>(155.5, 203.8)                  | 1492<br>(1367, 1629)                               |
| IgA anti-S1 (OD/CO) Median [IQR] (min-max)                | 0.88<br>[0.55, 1.79]<br>(0.15-8.11)     | 1.00<br>[0.53, 1.73]<br>(0.26-7.30)      | 5.25<br>[3.94, 9.00]<br>(0.70-9.00)                |
| sVNT (Wild-type, Euroimmun) (% Inhibition) [Median (IQR)] | 51.56<br>[33.43, 72.98]<br>(1.36-95.17) | 76.52<br>[53.10, 87.97]<br>(-0.27-98.76) | 99.49<br>[99.18, 99.62]<br>(94.03-99.79)           |
| sVNT (Wild-type,                                          | 66.60                                   | 88.86                                    | 97.76                                              |

|                               |                |                |                |
|-------------------------------|----------------|----------------|----------------|
| GenScript) (%)                | [48.86, 79.41] | [75.65, 96.35] | [96.98, 97.83] |
| Inhibition) [Median<br>(IQR)] | (21.12-92.50)  | (52.94-98.12)  | (86.56-97.99)  |
| sVNT (B.1.1.7,                | 42.11          | 75.94          | 97.24          |
| GenScript) (%)                | [28.97, 58.31] | [61.48, 88.38] | [94.71, 97.65] |
| Inhibition) [Median<br>(IQR)] | (7.21-73.15)   | (38.23-97.80)  | (82.67-98.07)  |
| sVNT (B.1.351,                | 34.86          | 65.20          | 92.88          |
| GenScript) (%)                | [20.46, 47.33] | [43.13, 77.99] | [86.82, 94.82] |
| Inhibition) [Median<br>(IQR)] | (4.15-72.43)   | (13.33-90.92)  | (67.14-96.56)  |
| sVNT (B.1.617.2,              | 48.93          | 83.93          | 97.22          |
| GenScript) (%)                | [36.12, 63.42] | [67.66, 94.59] | [95.55, 97.90] |
| Inhibition) [Median<br>(IQR)] | (12.46-85.45)  | (51.62-97.83)  | (78.33-98.09)  |

---
